# Supplementary material for: The Comparative Toxic Impact Assessment of Carbon Nanotubes, Fullerene, Graphene, and Graphene Oxide on Marine Microalgae Porphyridium purpureum
Source: MDPI journal article supplement (doi:10.3390/toxics11060491), 2023-05-30
Supplement: s1 [file s1]

# The Comparative Toxic Impact Assessment of Carbon Nanotubes, Fullerene, Graphene, and Graphene Oxide on Marine Microalgae *Porphyridium purpureum*

Konstantin Pikula <sup>1,\*</sup>, Seyed Ali Johari <sup>2</sup>, Ralph Santos-Oliveira <sup>3,4</sup> and Kirill Golokhvast <sup>1,5</sup>

<sup>1</sup> Polytechnical Institute, Far Eastern Federal University, 10 Ajax Bay, Russky Island, Vladivostok 690922, Russia; golokhvast@sfsc.ru

<sup>2</sup> Department of Fisheries, Faculty of Natural Resources, University of Kurdistan, Pasdaran St, Sanandaj 66177-15175, Iran; sajohari@gmail.com

<sup>3</sup> Laboratory of Nanoradiopharmaceuticals and Synthesis of Novel Radiopharmaceuticals, Nuclear

Engineering Institute, Brazilian Nuclear Energy Commission, Rua Hélio de Almeida 75, Rio de Janeiro 21941906, Brazil; roliveira@ien.gov.br

<sup>4</sup> Laboratory of Nanoradiopharmaceuticals and Radiopharmacy, Rio de Janeiro State University, R. São Francisco Xavier, 524, Rio de Janeiro 23070200, Brazil

<sup>5</sup> Siberian Federal Scientific Center of Agrobiotechnology RAS, Centralnaya Str., Presidium, Krasnoobsk 633501, Russia

\* Correspondence: k.pikula@mail.ru

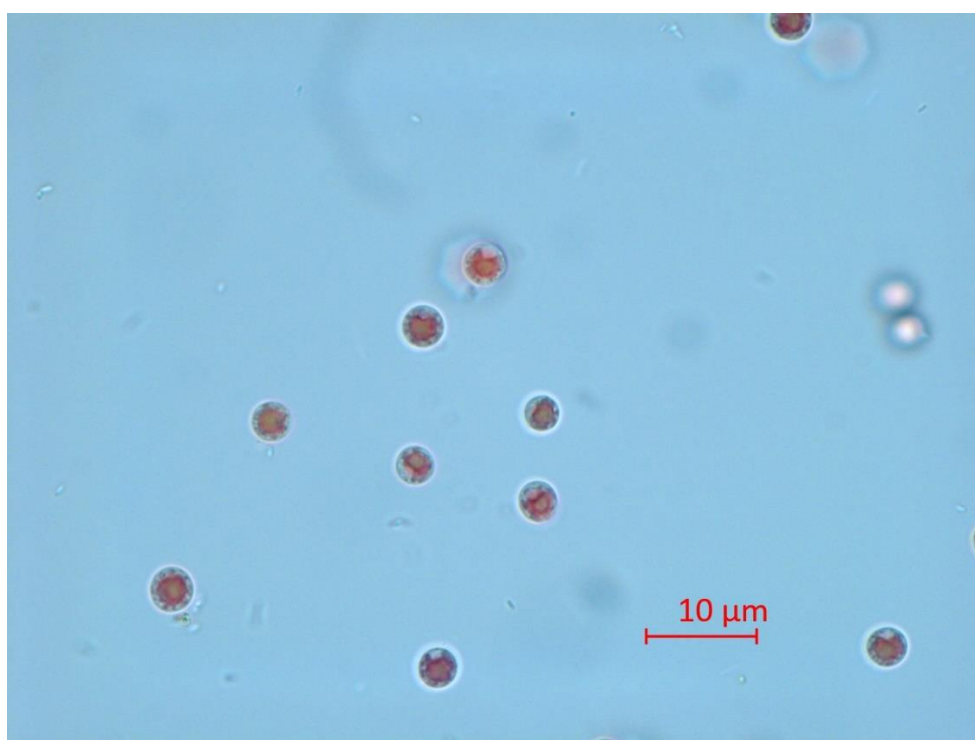

Figure S1. Microscopic picture of *P. purpureum* from the control group.

**Table S1.** The statistical significance calculation of growth rate, esterase activity, membrane potential, and ROS generation changes in *P. purpureum* cells.

| Concentration.<br>mg/L          | CNTs |         | C60  |         | Gr   |         | GrO  |         |
|---------------------------------|------|---------|------|---------|------|---------|------|---------|
| Growth rate inhibition, 96 h    |      |         |      |         |      |         |      |         |
| 1                               | ***  | 0.0004  | ns   | 0.6562  | ns   | 0.4119  | **** | <0.0001 |
| 10                              | **** | <0.0001 | ns   | 0.7143  | ns   | 0.0883  | **** | <0.0001 |
| 25                              | **** | <0.0001 | ns   | 0.6845  | **   | 0.0049  | **** | <0.0001 |
| 50                              | **** | <0.0001 | ns   | 0.2042  | **** | <0.0001 | **** | <0.0001 |
| 75                              | **** | <0.0001 | *    | 0.0454  | **** | <0.0001 | **** | <0.0001 |
| 100                             | n/a  | <0.0001 | **   | 0.0057  | **** | <0.0001 | **** | <0.0001 |
| 125                             | n/a  | <0.0001 | *    | 0.0118  | **** | <0.0001 | **** | <0.0001 |
| Esterase activity change, 24 h  |      |         |      |         |      |         |      |         |
| 1                               | *    | 0.0224  | ***  | 0.0007  | ns   | 0.2676  | ns   | 0.9998  |
| 10                              | **** | <0.0001 | **** | <0.0001 | **   | 0.0018  | **   | 0.0032  |
| 25                              | **** | <0.0001 | **** | <0.0001 | **** | <0.0001 | **** | <0.0001 |
| 50                              | **** | <0.0001 | ns   | 0.2647  | **** | <0.0001 | **** | <0.0001 |
| 75                              | **** | <0.0001 | ns   | 0.1285  | **** | <0.0001 | **** | <0.0001 |
| 100                             | n/a  | <0.0001 | **** | <0.0001 | **** | <0.0001 | **** | <0.0001 |
| 125                             | n/a  | <0.0001 | **** | <0.0001 | **** | <0.0001 | **** | <0.0001 |
| Membrane potential change, 24 h |      |         |      |         |      |         |      |         |
| 1                               | ns   | 0.2576  | ns   | 0.1437  | ns   | 0.1169  | ns   | 0.1001  |
| 10                              | ns   | 0.9020  | *    | 0.0148  | ***  | 0.0004  | ns   | 0.0617  |
| 25                              | ns   | 0.1008  | *    | 0.0207  | **** | <0.0001 | ns   | 0.3921  |
| 50                              | **** | <0.0001 | **   | 0.0020  | **** | <0.0001 | ns   | 0.9951  |
| 75                              | **** | <0.0001 | **** | <0.0001 | ***  | 0.0009  | *    | 0.0106  |
| 100                             | n/a  | <0.0001 | **** | <0.0001 | **** | <0.0001 | **   | 0.0024  |
| 125                             | n/a  | <0.0001 | **** | <0.0001 | **** | <0.0001 | **   | 0.0067  |
| ROS generation change, 24 h     |      |         |      |         |      |         |      |         |
| 1                               | ns   | 0.6425  | ns   | 0.4558  | ns   | 0.6279  | ns   | 0.0756  |
| 10                              | ns   | 0.9997  | ns   | 0.4631  | ns   | 0.5122  | ns   | 0.1290  |
| 25                              | ***  | 0.0002  | ns   | 0.3701  | ns   | 0.2023  | ns   | 0.1007  |
| 50                              | ***  | 0.0004  | ns   | 0.9998  | **** | <0.0001 | **   | 0.0029  |
| 75                              | ***  | 0.0003  | ns   | 0.2486  | **** | <0.0001 | **** | <0.0001 |
| 100                             | n/a  | 0.0109  | ns   | 0.6707  | **** | <0.0001 | **** | <0.0001 |
| 125                             | n/a  | 0.0337  | ns   | 0.9997  | **** | <0.0001 | **** | <0.0001 |

ROS, Reactive oxygen species; \*,  $p < 0.05$ ; \*\*,  $p < 0.005$ ; \*\*\*,  $p < 0.0005$ ; \*\*\*\*,  $p < 0.0001$ ; n/a, not assessed; ns, nonsignificant ( $p > 0.05$ ).

**Table S2.** The statistical significance calculation of the changes in the size of *P. purpureum* cells after 96 h of exposure to carbon nanomaterials.

| Concentration,<br>mg/L | 4-6 $\mu\text{m}$ |         | 6-10 $\mu\text{m}$ |        | 10-15 $\mu\text{m}$ |        |
|------------------------|-------------------|---------|--------------------|--------|---------------------|--------|
| CNTs                   |                   |         |                    |        |                     |        |
| 1                      | ns                | 0.7792  | ns                 | 0.7875 | ns                  | 0.9993 |
| 10                     | ns                | 0.7496  | ns                 | 0.8065 | ns                  | 0.3760 |
| 25                     | ***               | 0.0002  | ***                | 0.0001 | ns                  | 0.5322 |
| 50                     | ****              | <0.0001 | ***                | 0.0001 | ns                  | 0.9988 |
| 75                     | n/a               | n/a     | n/a                | n/a    | n/a                 | n/a    |
| 100                    | n/a               | n/a     | n/a                | n/a    | n/a                 | n/a    |
| 125                    | n/a               | n/a     | n/a                | n/a    | n/a                 | n/a    |

| C60 |      |         |      |         |      |         |
|-----|------|---------|------|---------|------|---------|
| 1   | *    | 0.0404  | *    | 0.0390  | ns   | 0.9978  |
| 10  | *    | 0.0184  | *    | 0.0178  | ns   | 0.8838  |
| 25  | ns   | 0.5608  | ns   | 0.5615  | ns   | 0.8495  |
| 50  | ns   | 0.9631  | ns   | 0.9589  | ns   | 0.9137  |
| 75  | ns   | 0.8700  | ns   | 0.8708  | ns   | 0.9589  |
| 100 | ns   | 0.9924  | ns   | 0.9919  | ns   | 0.9997  |
| 125 | ns   | 0.4260  | ns   | 0.4262  | ns   | 0.8115  |
| Gr  |      |         |      |         |      |         |
| 1   | **   | 0.0090  | **   | 0.0088  | ns   | 0.9999  |
| 10  | ns   | 0.5525  | ns   | 0.5537  | ns   | 0.9936  |
| 25  | ns   | 0.3239  | ns   | 0.3188  | ns   | 0.9977  |
| 50  | **   | 0.0018  | **   | 0.0018  | ns   | 0.9977  |
| 75  | **   | 0.0029  | **   | 0.0028  | ns   | 0.9317  |
| 100 | **   | 0.0013  | **   | 0.0013  | ns   | 0.9999  |
| 125 | **** | <0.0001 | **** | <0.0001 | ns   | 0.7740  |
| GrO |      |         |      |         |      |         |
| 1   | ns   | 0.1397  | ns   | 0.1320  | ns   | 0.9999  |
| 10  | ns   | 0.9784  | ns   | 0.9911  | ns   | 0.5981  |
| 25  | **   | 0.0019  | **   | 0.0028  | *    | 0.0183  |
| 50  | **** | <0.0001 | **** | <0.0001 | **** | <0.0001 |
| 75  | **** | <0.0001 | ***  | 0.0001  | **** | <0.0001 |
| 100 | ***  | 0.0003  | **   | 0.0019  | **** | <0.0001 |
| 125 | ***  | 0.0003  | **   | 0.0089  | **** | <0.0001 |

ROS, Reactive oxygen species; \*,  $p < 0.05$ ; \*\*,  $p < 0.005$ ; \*\*\*,  $p < 0.0005$ ; \*\*\*\*,  $p < 0.0001$ ; n/a, not assessed; ns, nonsignificant ( $p > 0.05$ ).
